# Supplementary material for: Pelophylax kurtmuelleri in Croatia: genetic evidence supports a native status in the Konavle Field and Neretva Delta
Source: Research Square preprint supplement (doi:10.21203/rs.3.rs-8671337/v1), 2026-01-30
Supplement: Supplementary file 1 [file 6e8138a6f90701d2eba6d21c.docx]

**Pelophylax kurtmuelleri in Croatia: genetic evidence supports a native status in the Konavle Field and Neretva Delta**

Matej Vucić1*, Marina Blažević2, Dušan Jelić2, Frederic Grandjean3, Marija Krajnović2, Goran Slivšek4, Karmela Adžić5, Goran Klobučar1

Supplementary material

**Table S1.** BOLD and GenBank accession numbers of all obtained sequences from this study. **(in process, will be added)**

| **Sequence** | **GenBank accession number** | **BOLD accession number** |
| --- | --- | --- |
| **SAI-1** | | |
| PEL1 |  |  |
| PEL2 |  |  |
| PEL3 |  |  |
| PEL4 |  |  |
| PEL5 |  |  |
| PEL7 |  |  |
| PEL8 |  |  |
| PEL9 |  |  |
| PEL10 |  |  |
| PEL11 |  |  |
| PEL12 |  |  |
| PEL13 |  |  |
| PEL14 |  |  |
| PEL15 |  |  |
| PEL16 |  |  |
| PEL17 |  |  |
| PEL18 |  |  |
| PEL19 |  |  |
| PEL20 |  |  |
| PEL21 |  |  |
| PEL22 |  |  |
| PEL23 |  |  |
| PEL24 |  |  |
| PEL25 |  |  |
| PEL26 |  |  |
| PEL27 |  |  |
| PEL28 |  |  |
| PEL29 |  |  |
| PEL30 |  |  |
| PEL31 |  |  |
| PEL32 |  |  |
| PEL33 |  |  |
| PEL34 |  |  |
| PEL35 |  |  |
| **COI** | | |
| PEL1 |  |  |
| PEL2 |  |  |
| PEL3 |  |  |
| PEL4 |  |  |
| PEL5 |  |  |
| PEL7 |  |  |
| PEL8 |  |  |
| PEL9 |  |  |
| PEL10 |  |  |
| PEL11 |  |  |
| PEL12 |  |  |
| PEL13 |  |  |
| PEL14 |  |  |
| PEL15 |  |  |
| PEL16 |  |  |
| PEL17 |  |  |
| PEL18 |  |  |
| PEL19 |  |  |
| PEL20 |  |  |
| PEL21 |  |  |
| PEL22 |  |  |
| PEL23 |  |  |
| PEL24 |  |  |
| PEL25 |  |  |
| PEL26 |  |  |
| PEL27 |  |  |
| PEL28 |  |  |
| PEL29 |  |  |
| PEL30 |  |  |
| PEL31 |  |  |
| PEL32 |  |  |
| PEL33 |  |  |
| PEL34 |  |  |
| **ND2** | | |
| PEL1 |  |  |
| PEL2 |  |  |
| PEL3 |  |  |
| PEL4 |  |  |
| PEL5 |  |  |
| PEL7 |  |  |
| PEL8 |  |  |
| PEL9 |  |  |
| PEL10 |  |  |
| PEL11 |  |  |
| PEL12 |  |  |
| PEL13 |  |  |
| PEL15 |  |  |
| PEL16 |  |  |
| PEL17 |  |  |
| PEL18 |  |  |
| PEL19 |  |  |
| PEL20 |  |  |
| PEL21 |  |  |
| PEL22 |  |  |
| PEL23 |  |  |
| PEL24 |  |  |
| PEL25 |  |  |
| PEL26 |  |  |
| PEL28 |  |  |
| PEL29 |  |  |
| PEL30 |  |  |
| PEL31 |  |  |
| PEL32 |  |  |
| PEL33 |  |  |
| PEL34 |  |  |

**Table S2.** GenBank and BOLD accession numbers of all additional sequences used in this study.

| **Species** | **GenBank Accession number** | **BOLD accession number** |
| --- | --- | --- |
| **SAI-1** | | |
| *Pelophylax kurtmuelleri* | MH038019 |  |
|  | MH038018 |  |
|  | MH038017 |  |
|  | MH038016 |  |
|  | MH038013 |  |
|  | MH038012 |  |
|  | MH038011 |  |
|  | MH038010 |  |
|  | MW296110 |  |
|  | MW296109 |  |
|  | MW296108 |  |
|  | MW296107 |  |
|  | MW296106 |  |
|  | MF667640 |  |
|  | MF667639 |  |
|  | MF667638 |  |
|  | MF667637 |  |
|  | MF667636 |  |
|  | MF667635 |  |
|  | MF667634 |  |
|  | KY424540 |  |
|  | MN497957 |  |
|  | FN432367 |  |
|  | FN432366 |  |
|  | MH038019 |  |
|  | MH038018 |  |
|  | MH038016 |  |
|  | MH038013 |  |
|  | MH038012 |  |
|  | MW296109 |  |
|  | MW296108 |  |
|  | MF667639 |  |
|  | MF667638 |  |
| *Pelophylax ridibundus* | PP210087 |  |
|  | PP210086 |  |
|  | PP210088 |  |
|  | KX503320 |  |
|  | KX503321 |  |
|  | KX503322 |  |
|  | OL702781 |  |
|  | OL702780 |  |
|  | MN497958 |  |
|  | JQ965521 |  |
| *Pelophylax lessonae* | MF094367 |  |
|  | MF094368 |  |
| *Pelophylax shqipericus* | MH038015 |  |
|  | MH038014 |  |
|  | MW296105 |  |
|  | MW296102 |  |
| **COI** | | |
| *Pelophylax kurtmuelleri* | MT881786 | GBMNF3350-22 |
|  | JN871599.1 |  |
| *Pelophylax ridibundus* | MN993187 | BCAHF082 |
|  | HQ954782 | FBHER133-10 |
|  | KP697821 | FBHER216-14 |
|  | KP697877 | FBHER220-14 |
|  | KP697907 | FBHER224-14 |
|  | KP697880 | FBHER228-14 |
|  | MN993187.1 |  |
|  | HQ954782.1 |  |
|  | KP697946.1 |  |
| *Pelophylax lessonae* | MN993185 | BCAHF016-17 |
|  | MN993184 | BCAHF193-19 |
|  | HM901965 | FBHER061-09 |
|  | KP697908 | FBHER207-14 |
|  | KP697848 | FBHER208-14 |
|  | KP697868 | FBHER209-14 |
|  | KP697934 | FBHER215-14 |
| *Pelophylax shqipericus* |  | GBMTG4326-16 |
|  |  |  |
|  |  |  |
| **ND2** | | |
| *Pelophylax kurtmuelleri* | OP820697 |  |
|  | OP820684 |  |
|  | OP820651 |  |
|  | OP820692 |  |
|  | OP820693 |  |
|  | OP820694 |  |
|  | OP820691 |  |
|  | OP820690 |  |
|  | OP820689 |  |
|  | OP820686 |  |
|  | OP820685 |  |
|  | OP820680 |  |
|  | OP820670 |  |
|  | OP820668 |  |
|  | OP820669 |  |
|  | OP820656 |  |
|  | OP820650 |  |
|  | OP820649 |  |
| *Pelophylax ridibundus* | PV177133 |  |
|  | PV177132 |  |
|  | PV177130 |  |
|  | PP335555 |  |
|  | OP794108 |  |
|  | OP794100 |  |
|  | OP794102 |  |
| *Pelophylax lessonae* | PV177145 |  |
|  | PV177144 |  |
|  | KY129865 |  |
|  | PV177139 |  |
| *Pelophylax shqipericus* | OP794097 |  |
|  | OP794096 |  |
|  | OP794095 |  |
|  | OP794094 |  |
|  | OP794093 |  |

**Table S3.** Intraspecific uncorrected p-distances of COI sequences of *P. kurtmueller*i specimens from this study

**Table S4.** Intraspecific uncorrected p-distances of COI sequences of *P. kurtmuelleri* specimens from this study and including publicly available sequences.

***Tables S3 and S4 are provided in separate Excell tables.**

**Fig S1.** Gel electrophoresis of the SAI-1 nuclear marker on all analysed samples.

**Fig S2.** Detailed view of the gel electrophoresis of the SAI-1 nuclear marker on three samples.


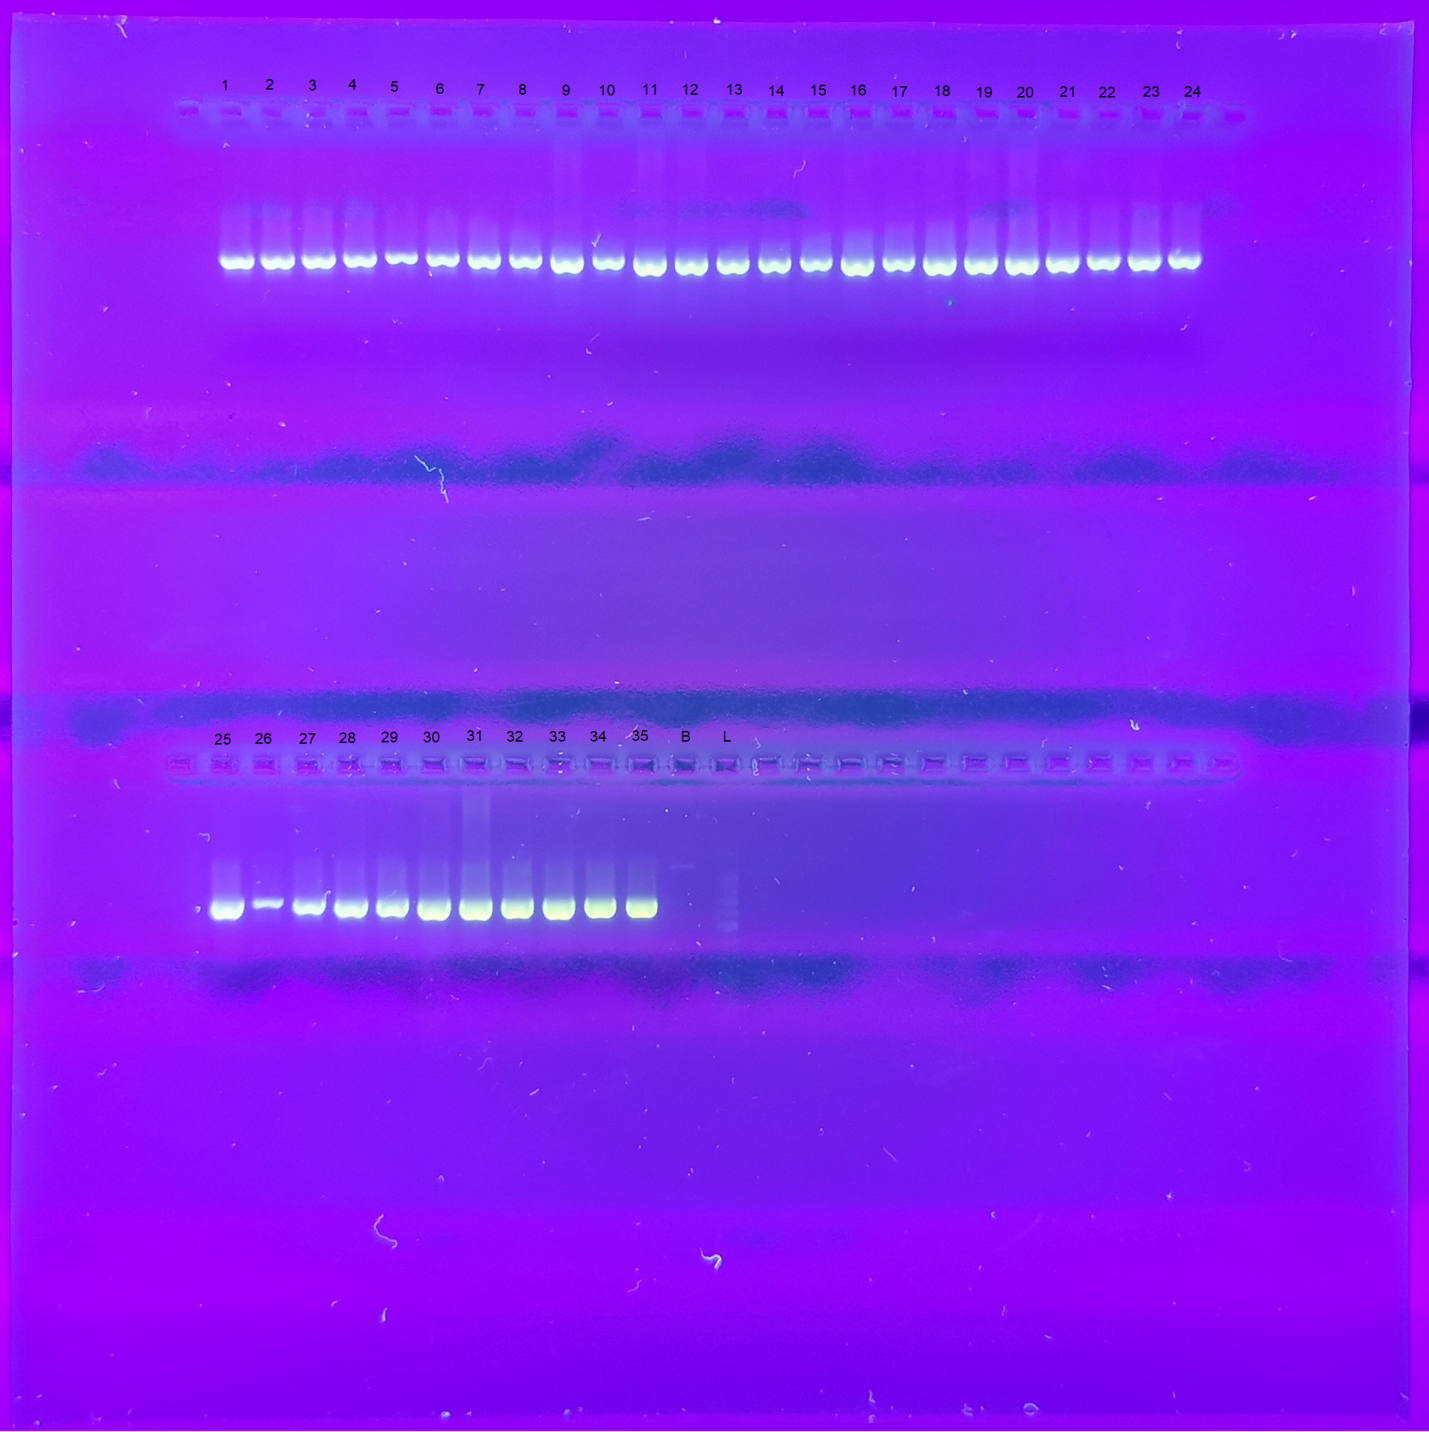


**Fig S1.** Gel electrophoresis of the SAI-1 nuclear marker on all analysed samples.


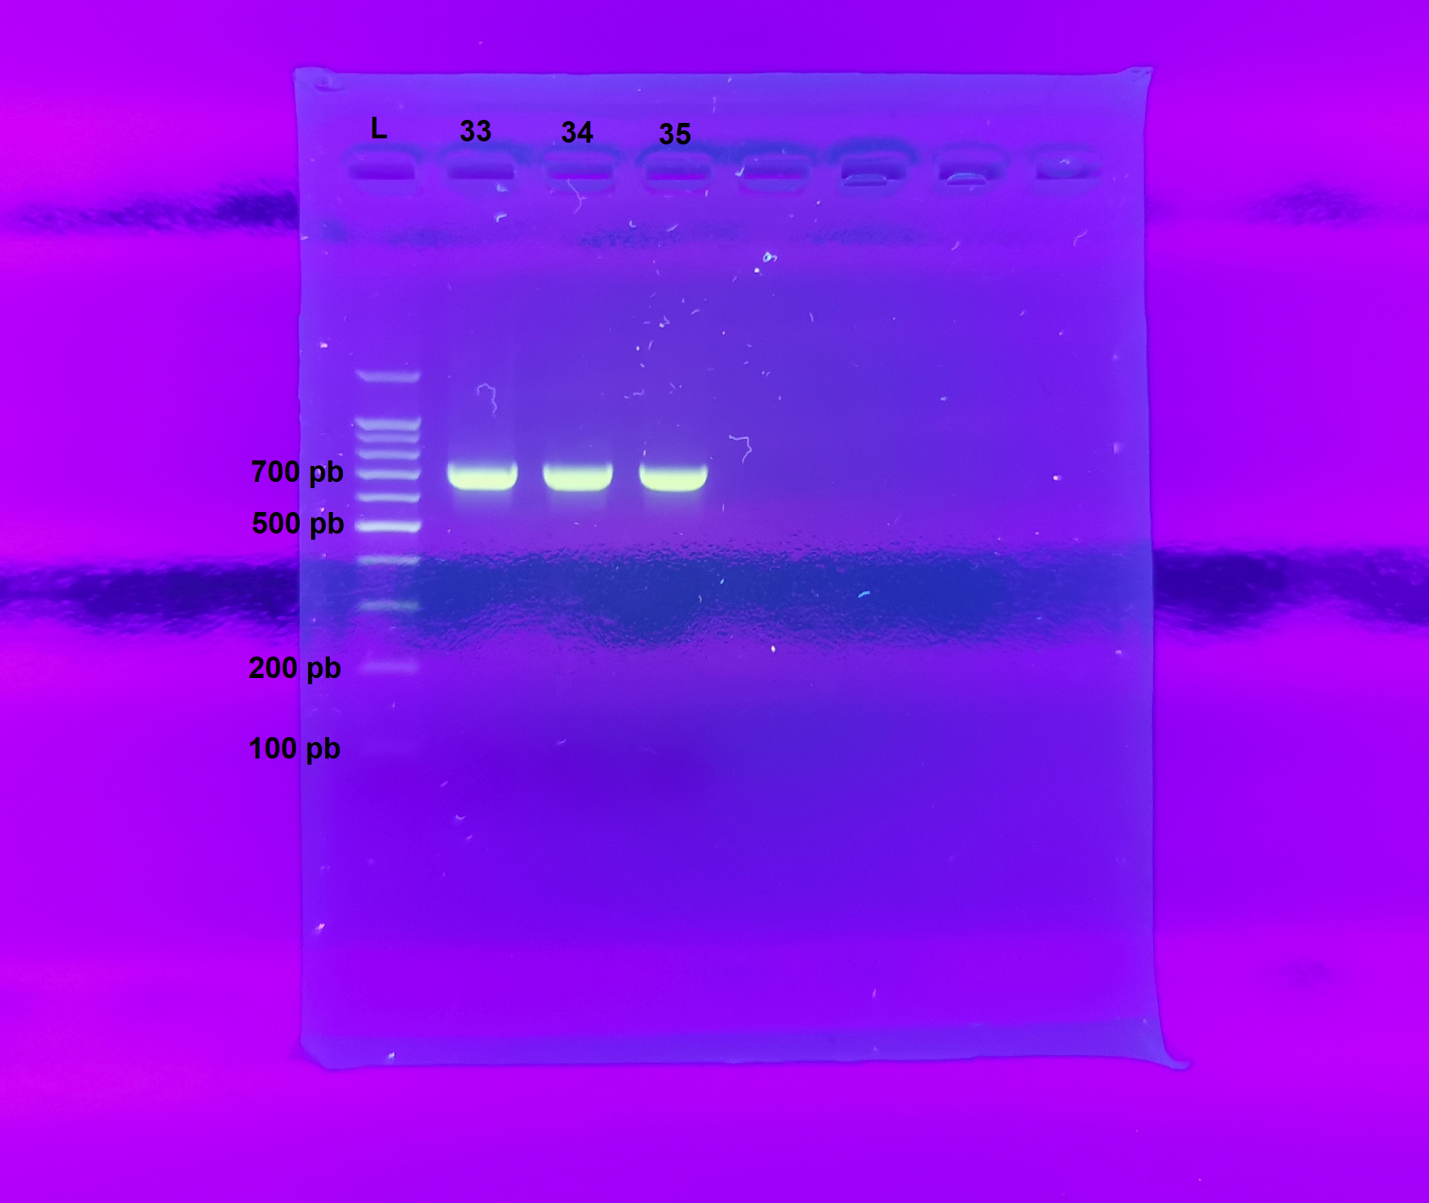


**Fig. S2.** Detailed view of the gel electrophoresis of the SAI-1 nuclear marker on three samples.
